# Supplementary material for: Gemcitabine Eliminates Double Minute Chromosomes from Human Ovarian Cancer Cells
Source: PubMed Central journal article supplement (PMC3750019; doi:10.1371/journal.pone.0071988), 2013-08-22

Figure S1

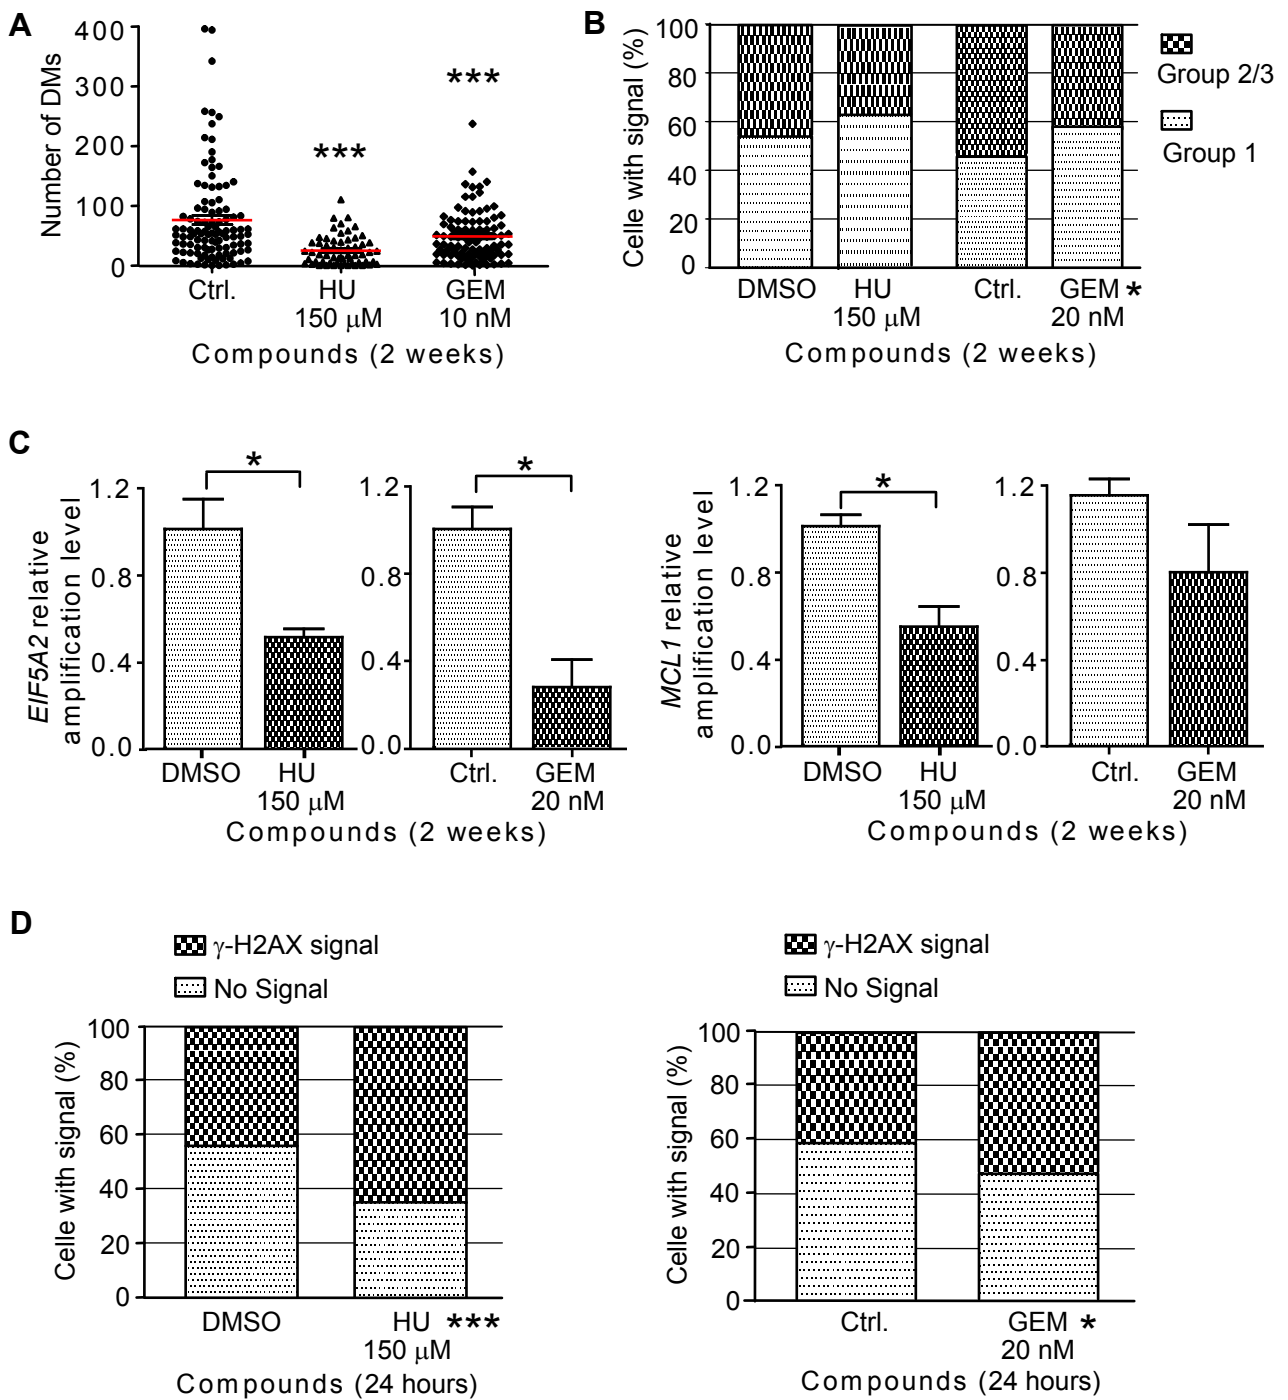

Supplement: pone.0071988.s001.pdf [file pone.0071988.s001.pdf]
